# Supplementary material
Source: PubMed Central journal article supplement (PMC3575707)
Supplement: supp_125.23.5721_JCS108837.pdf [file supp_125.23.5721_JCS108837.pdf]

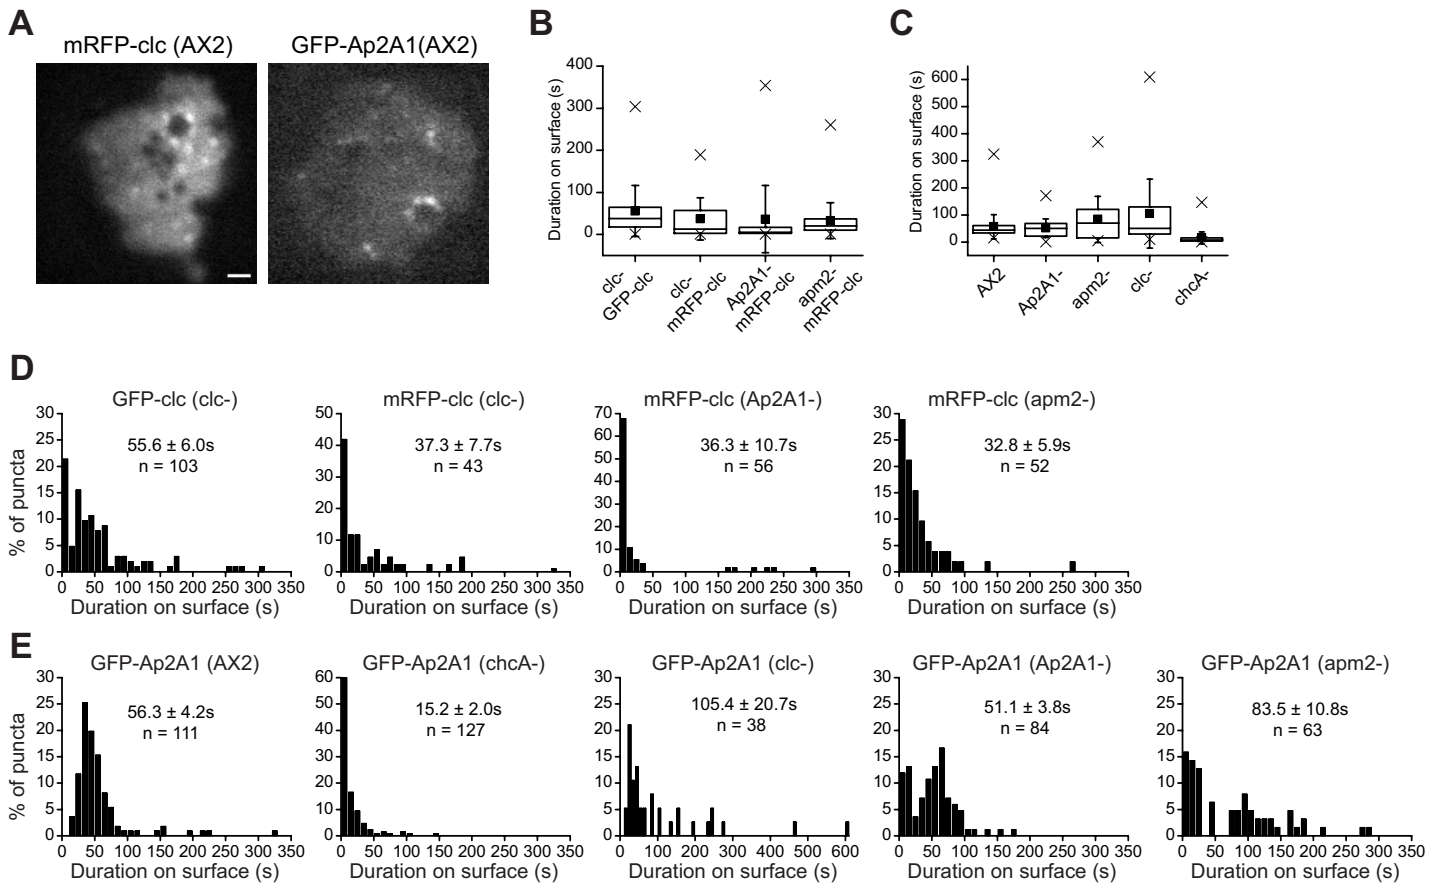

**Fig. S1. Dynamics of clathrin and AP2 (related to Fig. 2).** (A) TIR-FM images of mRFP-clc and GFP-Ap2A1 showing examples of puncta localized in rings most likely around contractile vacuole bladders. Scale bar =  $1\mu\text{m}$ . (B-C) Box charts showing the durations of XFP-clc puncta (B) or GFP-Ap2A1 puncta (C) in the different cell lines. Crosses = maximum and minimum values; solid square = mean; error bars = s.d.; box = 25, 50 and 75 percentile. (D-E) Histograms of the duration on the surface for XFP-clc puncta (D) or GFP-Ap2A1 puncta (E) in the different cell lines. The mean duration  $\pm$  s.e.m and the number of puncta measured are given.

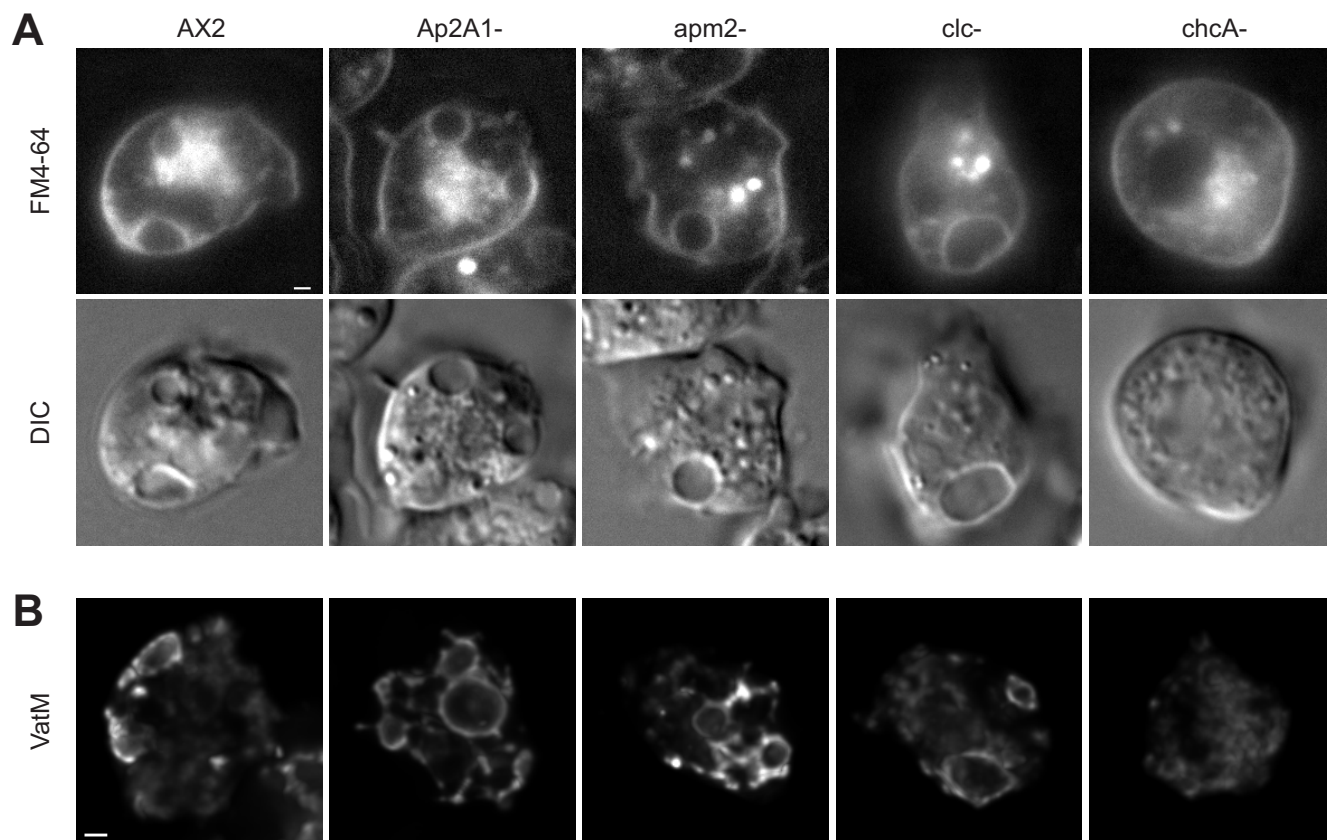

**Fig. S2. Localization of contractile vacuole markers in AP2 and clathrin knockouts (related to Fig. 6).** (A) Widefield microscopy images of FM4-64 labeling in AX2, *Ap2A1-*, *apm2-*, *clc-* and *chcA-* cells and corresponding DIC images. (B) Maximum intensity projection of VatM immunostaining in AX2, *Ap2A1-*, *apm2-*, *clc-* and *chcA-* cells. Scale bars = 1 $\mu$ m.

**Table S1. AP genes in *Dictyostelium***

| Name                       | Gene               | Dictybase Gene ID            | Percent identity with human (name and accession number) | Divergence | Experimental evidence           |
|----------------------------|--------------------|------------------------------|---------------------------------------------------------|------------|---------------------------------|
| AP-1<br>$\gamma$ subunit   | ap1g1              | DDB_G0281957                 | 44.4<br>(AP-1 gamma-1 isoform b, NP_001119)             | 84.2       | (Lefkir et al., 2003)           |
| AP-1<br>$\beta$ subunit    | ap1b1              | DDB_G0279141                 | 52.2<br>(AP-1 beta-1 isoform b, NP_663782)              | 68.4       | (Sosa et al., 2012)             |
| AP-1<br>$\mu$ subunit      | apm1               | DDB_G0289247                 | 67.4<br>(AP-1 mu-1 isoform 2, NP_115882)                | 38.4       | (Lefkir et al., 2003)           |
| AP-1<br>$\sigma$ 1 subunit | ap1s1              | DDB_G0279359                 | 44.9<br>(AP-1 sigma-2, NP_003907)                       | 89.1       |                                 |
| AP-1<br>$\sigma$ 2 subunit | ap1s2              | DDB_G0295711                 | 57.8<br>(AP-1 sigma-2, NP_003907)                       | 53.1       |                                 |
| AP-2<br>$\alpha$ subunit   | ap2a1-1<br>ap2a1-2 | DDB_G0273439<br>DDB_G0273501 | 38.3<br>(AP-2 alpha-2 isoform 2, NP_036437)             | 100.3      | This study                      |
| AP-2<br>$\beta$ subunit    | ap1b1              | DDB_G0279141                 | 51.9<br>(AP-2 beta isoform b, NP_001273)                | 70.0       | This study, (Sosa et al., 2012) |
| AP-2<br>$\mu$ subunit      | apm2               | DDB_G0277139                 | 50.8<br>(AP-2 mu isoform a, NP_004059)                  | 64.0       | This study, (Sosa et al., 2012) |
| AP-2<br>$\sigma$ subunit   | ap2s1              | DDB_G0289721                 | 62.0<br>(AP-2 sigma isoform AP17, NP_004060)            | 52.6       | This study                      |
| AP-3<br>$\delta$ subunit   | ap3d1              | DDB_G0279537                 | 35.9<br>(AP-3 delta-1 isoform 2, NP_003929)             | 102.5      | (Bennett et al., 2008)          |
| AP-3<br>$\beta$ subunit    | ap3b-1<br>ap3b-2   | DDB_G0272578<br>DDB_G0274003 | 31.6<br>(AP-3 beta-2, NP_004635)                        | 113.5      | (Bennett et al., 2008)          |
| AP-3<br>$\mu$ subunit      | apm3               | DDB_G0277901                 | 47.4<br>(AP-3 mu-1, NP_036227)                          | 74.6       | (Bennett et al., 2008)          |
| AP-3<br>$\sigma$ subunit   | ap3s1              | DDB_G0275405                 | 64.9<br>(AP-3 sigma-1, NP_001275)                       | 39.5       |                                 |
| AP-4<br>$\epsilon$ subunit | ap4e1              | DDB_G0280427                 | 21.6<br>(AP-4 epsilon-1, NP_031373)                     | 170.5      |                                 |
| AP-4<br>$\beta$ subunit    | ap4b1              | DDB_G0283319                 | 24.0<br>(AP-4 beta-1, NP_006585)                        | 157.9      |                                 |
| AP-4<br>$\mu$ subunit      | apm4               | DDB_G0276945                 | 21.6<br>(AP-4 mu-1, NP_004713)                          | 148.2      |                                 |
| AP-4                       | ap4s1              | DDB_G0284905                 | 55.4                                                    | 59.3       |                                 |

|                  |  |                                        |  |  |
|------------------|--|----------------------------------------|--|--|
| $\sigma$ subunit |  | (AP-4 sigma-1 isoform 2, NP_001121598) |  |  |
|------------------|--|----------------------------------------|--|--|

The genes annotated as belonging to AP complexes in *Dictyostelium* ([www.dictybase.org](http://www.dictybase.org)) are shown. Homologous human proteins were identified by searching GenBank using BLASTP (<http://www.ncbi.nlm.nih.gov/blast/Blast.cgi>) and the *Dictyostelium* AP complex protein sequences. The top hit was used to calculate percent identity and phylogenetic divergence using the Clustal V method and MegAlign 9 software.

**Table S2. Summary of LC-MS/MS Results (related to Fig. 1).**

| Protein                      | DDB ID   | AX2 + GFP-Ap2A1                                 |                     |                  | <i>apm2</i> - + GFP-Ap2A1                       |                     |                  |
|------------------------------|----------|-------------------------------------------------|---------------------|------------------|-------------------------------------------------|---------------------|------------------|
|                              |          | Number of unique peptides<br>(total # peptides) | Percent<br>coverage | Protein<br>score | Number of unique peptides<br>(total # peptides) | Percent<br>coverage | Protein<br>score |
| ap1b1<br>( $\beta$ subunit)  | G0279141 | 35 (103)                                        | 41%                 | 3548             | 8 (11)                                          | 10%                 | 116              |
| apm2<br>( $\mu$ subunit)     | G0277139 | 13 (71)                                         | 31%                 | 2453             | N/A                                             | N/A                 | N/A              |
| ap2s1<br>( $\sigma$ subunit) | G0289721 | 7 (36)                                          | 44%                 | 750              | 6 (15)                                          | 30%                 | 136              |
| ap1g1<br>( $\gamma$ subunit) | G0281957 | N/A                                             | N/A                 | N/A              | 3 (5)                                           | 3%                  | 76               |
| eps15                        | G0287325 | 34 (118)                                        | 41%                 | 4728             | 22 (62)                                         | 37%                 | 1867             |

Summary of LC-MS/MS data for proteins identified from the gels shown in Fig. 1B,C.

**Table S3. Kolmogorov-Smirnov (KS) test *P* values (related to Fig. 2 and Fig. S1).**

KS test was performed to ask whether the distribution of the durations of cell surface puncta measured in different cell lines are drawn from the same distribution.

| <b>Data Set 1</b>                  | <b>Data Set 2</b>           | <b>KS <i>P</i> value</b>  |
|------------------------------------|-----------------------------|---------------------------|
| GFP-clc ( <i>clc-</i> )            | GFP-Ap2A1 (AX2)             | 0.04594                   |
| GFP-clc minus 10s ( <i>clc-</i> )  | GFP-Ap2A1 (AX2)             | 0.06564                   |
| mRFP-clc ( <i>clc-</i> )           | GFP-Ap2A1 (AX2)             | $2.15915 \times 10^{-8}$  |
| mRFP-clc minus 10s ( <i>clc-</i> ) | GFP-Ap2A1 (AX2)             | 0.0747                    |
|                                    |                             |                           |
| mRFP-clc ( <i>clc-</i> )           | mRFP-clc ( <i>Ap2A1-</i> )  | 0.04744                   |
| mRFP-clc ( <i>clc-</i> )           | mRFP-clc ( <i>apm2-</i> )   | 0.04795                   |
|                                    |                             |                           |
| GFP-Ap2A1 (AX2)                    | GFP-Ap2A1 ( <i>Ap2A1-</i> ) | 0.00937                   |
| GFP-Ap2A1 (AX2)                    | GFP-Ap2A1 ( <i>apm2-</i> )  | $2.22786 \times 10^{-5}$  |
| GFP-Ap2A1 (AX2)                    | GFP-Ap2A1 ( <i>clc-</i> )   | 0.01449                   |
| GFP-Ap2A1 (AX2)                    | GFP-Ap2A1 ( <i>chcA-</i> )  | $3.80114 \times 10^{-32}$ |

**Table S4. List of strains and expression plasmids used.**

| <b>Strain Name</b>        | <b>Expression Plasmid</b> |
|---------------------------|---------------------------|
| AX2/[A15]:GFP:Ap2A1       | 339-3 (Bsn)               |
| Ap2A1-/[A15]:GFP:Ap2A1    | 339-3 (Bsn)               |
| apm2-/[A15]:GFP:Ap2A1     | pDM304 (G418)             |
| clc-/[A15]:GFP:Ap2A1      | pDM304 (G418)             |
| chcA-/[A15]:GFP:Ap2A1     | pDM304 (G418)             |
| AX2/[A15]:mRFP:clc        | pDM304 (G418)             |
| Ap2A1-/[A15]: mRFP:clc    | pDM304 (G418)             |
| apm2-/[A15]: mRFP:clc     | pDM304 (G418)             |
| clc-/[A15]: mRFP:clc      | pDM304 (G418)             |
| chcA-/[A15]: mRFP:clc     | pDM304 (G418)             |
| AX2/[A15]:GFP:Ap2A1       | 339-3 (Bsn)               |
| [A15]:mRFP:clc            | pDM304 (G418)             |
| AX2/[A15]:GFP:Ap2A1       | 339-3 (Bsn)               |
| [A15]:clc:mRFP            | pDM304 (G418)             |
| AX2/[A15]:dajumin:GFP     | pDEXRH (G418)             |
| [A15]:mRFP:clc            | pDM326 (Bsn)              |
| AX2/[A15]:dajumin:GFP     | pDEXRH (G418)             |
| [A15]:mRFP:Ap2A1          | pDM358 (Hgr)              |
| Ap2A1-/[A15]: dajumin:GFP | pDM326 (Bsn)              |
| apm2-/[A15]: dajumin:GFP  | pDEXRH (G418)             |
| clc-/[A15]: dajumin:GFP   | pDEXRH (G418)             |
| chcA-/[A15]: dajumin:GFP  | pDEXRH (G418)             |

Strain shows the genetic background and the promoter used to drive expression. Plasmids used for expression are listed along with the antibiotic resistance used for selection. Bsn = blasticidin, G418 = geneticin, Hgr = hygromycin.
